# Supplementary material
Source: MDPI journal article supplement (https://www.mdpi.com/2079-6412/12/12/1892)
Supplement: s1 [file s1]

## Article

# Supplementary Materials: Supporting Information Sedum plumbizincicola Derived Functional Carbon for Activation of Peroxymonosulfate to Eliminate Bisphenol A: Performance and Reaction Mechanisms

Chao Liu <sup>1,2,†</sup>, Zhenxiang Chen <sup>3,†</sup>, Ruiqin Kang <sup>1</sup>, Yongsheng Niu <sup>1,\*</sup>, Wenhui Su <sup>1</sup>, Xiaolong Wang <sup>1</sup>, Dayong Tian <sup>1</sup> and Ying Xu <sup>2,\*</sup>

<sup>1</sup> Department of Environmental Engineering, College of Chemistry and Environmental Engineering, Anyang Institute of Technology, Anyang 455000, China; ayitlc@163.com (C.L.); krq1030@163.com (R.K.); swl@ayit.edu.cn (W.S.); wxl@ayit.edu.cn (X.W.); tiandayong@163.com (D.T.)

<sup>2</sup> College of Chemistry and Chemical Engineering, Henan University, Kaifeng 475004, China

<sup>3</sup> Jiangsu Xingzhou Ecological Environment Technology Co., Ltd., Nanjing 210004, China; czx0917@163.com

\* Correspondence: nys2205@163.com (Y.N.); hddcxu@126.com (Y.X.)

† These authors contributed equally to this work.

## Supporting Information Text S1 Details of electrochemical experiment.

Nafion solution (5.0 wt%, 0.1 mL) was mixed with ethanol (1 mL) and SPFCx (10 mg). Then, they were dispersed by ultrasound for 1 h to obtain a well-mixed suspension solution. After that 20  $\mu$ L suspension solution was dropped onto the glassy carbon electrode and then dried at 80 °C. All experiments were performed in 40 mM Na<sub>2</sub>SO<sub>4</sub> solution (40 mL). Electrochemical impedance spectroscopy (EIS) was conducted at open potential with a frequency range of 10<sup>6</sup> to 10<sup>-1</sup> Hz. Linear sweep voltammetry (LSV) was measured at the potential from -2.2 V (vs. Ag/AgCl). The open-circuit potentials of SPFCx were measured via open circuit potential-Time analysis. In addition, I-T curves were carried out at the bias of 0.0 V (vs. Ag/AgCl) and lasted 250 s.

**Citation:** Liu, C.; Chen, Z.; Kang, R.; Niu, Y.; Su, W.; Wang, X.; Tian, D.; Xu, Y. Sedum Plumbizincicola Derived Functional Carbon for Activation of Peroxymonosulfate to Eliminate Bisphenol A: Performance and Reaction Mechanisms. *Coatings* **2022**, *12*, 1892. <https://doi.org/10.3390/coatings12121892>

Academic Editor: Alexandru Enesca

Received: 27 October 2022

Accepted: 28 November 2022

Published: 5 December 2022

**Publisher's Note:** MDPI stays neutral with regard to jurisdictional claims in published maps and institutional affiliations.

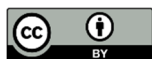

**Copyright:** © 2022 by the authors. Licensee MDPI, Basel, Switzerland. This article is an open access article distributed under the terms and conditions of the Creative Commons Attribution (CC BY) license (<https://creativecommons.org/licenses/by/4.0/>).
